# Supplementary material for: Comorbidity Patterns in Patients with Atopic Dermatitis Using Network Analysis in the EpiChron Study
Source: J Clin Med. 2022 Oct 29;11(21):6413. doi: 10.3390/jcm11216413 (PMC9658108; doi:10.3390/jcm11216413)
Supplement: Supplementary file 1 [file jcm-11-06413-s001.zip › Supplementary file for review.xlsx]

## Sheet: Women0_2
	Diseases with Prevalence >= 1%	Prevalence (%)	Cluster
	Acute and chronic tonsilitis	1.04384	1
	Asthma	2.71399	1
	Other congenital anomalies	3.17328	1
	Otitis media	33.5282	1
	Wax in ear	1.46138	2
	Other upper respiratory diseases	1.96242	2
	Other upper respiratory infections	83.7161	2

## Sheet: Women3_10
	Diseases with Prevalence >= 1%	Prevalence (%)	Cluster
	Headache; including migraine	5.68525	1
	Blindness and vision defects	8.39942	1
	Other gastrointestinal disorders	1.23981	1
	Other inflammatory condition of skin	1.49671	1
	Other congenital anomalies	3.23914	1
	Disorders usually diagnosed in infancy, childhood, or adolescence	3.19446	1
	Other nutritional; endocrine; and metabolic disorders	2.4126	1
	Obesity	1.67542	1
	Other ear and sense organ disorders	1.66425	2
	Acute and chronic tonsilitis	4.60181	2
	Miscellaneous mental health disorders	2.18921	2
	Otitis media	26.4604	2			v
	Wax in ear	2.68067	2
	Other upper respiratory infections	70.0436	2
	Asthma	7.79627	3
	Digestive congenital anomalies	1.16162	3
	Allergic rhinitis	4.021	3
	Other upper respiratory diseases	7.42768	3

## Sheet: Women11_17
	Diseases with Prevalence >= 1%	Prevalence (%)	Cluster
	Disorders of lipid metabolism	1.94897	1
	Blindness and vision defects	15.2301	1
	Other inflammatory condition of skin	2.27044	1
	Other bone disease and musculoskeletal deformities	7.53466	1
	Other congenital anomalies	2.89331	1
	Thyroid disorders	2.04943	2
	Headache; including migraine	10.5083	2
	Menstrual disorders	11.5531	2
	Anxiety disorders	3.85775	2
	Miscellaneous mental health disorders	2.95359	2
	Other nutritional; endocrine; and metabolic disorders	4.54089	2
	Obesity	4.03858	2
	Acne	9.40325	2
	Other ear and sense organ disorders	1.52702	3
	Acute and chronic tonsilitis	5.06329	3
	Other gastrointestinal disorders	1.0649	3
	Disorders usually diagnosed in infancy, childhood, or adolescence	3.27507	3
	Otitis media	18.1836	3
	Wax in ear	3.4559	3
	Other upper respiratory infections	67.1087	3
	Asthma	12.618	4
	Delirium, dementia, and amnestic and other cognitive disorders	1.94897	4
	Allergic rhinitis	12.6783	4
	Other upper respiratory diseases	15.6118	4

## Sheet: Women18_65
	Diseases with Prevalence >= 1%	Prevalence (%)	Cluster
	Thyroid disorders	13.8352	1
	Disorders of lipid metabolism	7.33446	1
	Glaucoma	1.37748	1
	Other ear and sense organ disorders	2.99662	1
	Other nervous system disorders	4.49493	1
	Genitourinary symptoms and ill-defined conditions	2.81537	1
	Menopausal disorders	6.45239	1
	Osteoarthritis	4.797	1
	Other non-traumatic joint disorders	1.26873	1
	Spondylosis; intervertebral disc disorders; other back problems	4.2291	1
	Osteoporosis	2.82745	1
	Acquired foot deformities	2.69454	1
	Delirium, dementia, and amnestic and other cognitive disorders	1.41373	1
	Mood disorder	13.2069	1
	Neoplasms	1.82455	1
	Other nutritional; endocrine; and metabolic disorders	10.4398	1
	Obesity	8.54277	1
	Hypertension	9.50942	1
	Diabetes Mellitus	2.36829	1
	Diseases of white blood cells	1.30498	2
	Headache; including migraine	15.1522	2
	Blindness and vision defects	7.26196	2
	Other eye disorders	1.20831	2
	Asthma	11.1527	2
	Esophageal disorders	2.52537	2
	Other gastrointestinal disorders	2.50121	2
	Nonmalignant breast conditions	2.77912	2
	Menstrual disorders	29.1808	2
	Other female genital disorders	1.37748	2
	Other inflammatory condition of skin	4.95408	2
	Other bone disease and musculoskeletal deformities	4.56742	2
	Other congenital anomalies	1.7158	2
	Joint disorders and dislocations; trauma-related	1.37748	2
	Anxiety disorders	20.6501	2
	Screening and history of mental health and substance abuse codes	13.3519	2
	Miscellaneous mental health disorders	6.1624	2
	Allergic rhinitis	17.5326	2
	Acne	8.22861	2
	Otitis media	7.50362	2
	Wax in ear	6.69406	2
	Other upper respiratory diseases	21.3992	2
	Other upper respiratory infections	61.8536	2
	Coagulation and hemorrhagic disorders	1.12373	3
	Cardiac dysrhythmias	1.38956	3
	Female infertility	1.43789	3

## Sheet: Women>65
	Diseases with Prevalence >= 1%	Prevalence (%)	Cluster
	Thyroid disorders	21.0978	1
	Disorders of lipid metabolism	23.3757	1
	Diseases of white blood cells	1.04556	1
	Headache; including migraine	7.02016	1
	Cataract	24.9066	1
	Blindness and vision defects	8.81255	1
	Other eye disorders	2.27782	1
	Other ear and sense organ disorders	10.941	1
	Other nervous system disorders	5.89993	1
	Esophageal disorders	4.96639	1
	Diverticulosis and diverticulitis	5.11576	1
	Other gastrointestinal disorders	3.54742	1
	Prolapse of female genital organs	2.09111	1
	Menstrual disorders	1.60568	1
	Menopausal disorders	9.03659	1
	Other inflammatory condition of skin	4.21957	1
	Rheumatoid arthritis and related disease	2.27782	1
	Osteoarthritis	38.7976	1
	Spondylosis; intervertebral disc disorders; other back problems	16.6169	1
	Osteoporosis	29.761	1
	Acquired foot deformities	6.8708	1
	Other bone disease and musculoskeletal deformities	2.83794	1
	Adjustment disorder	1.7177	1
	Anxiety disorders	20.7618	1
	Mood disorder	29.1636	1
	Screening and history of mental health and substance abuse codes	2.83794	1
	Miscellaneous mental health disorders	3.58476	1
	Other nutritional; endocrine; and metabolic disorders	29.9851	1
	Allergic rhinitis	8.21509	1
	Conjunctivitis, keratitis	1.00822	1
	Otitis media	3.4354	1
	External otitis	1.2696	1
	Wax in ear	8.73786	1
	Other upper respiratory diseases	11.8372	1
	Other upper respiratory infections	48.7304	1
	Parkinsons disease	2.20314	2
	Other hereditary and degenerative nervous system conditions	6.98282	2
	Epilepsy; convulsions	1.19492	2
	Acute myocardial infarction	1.75504	2
	Acute cerebrovascular disease	6.98282	2
	Transient cerebral ischemia	6.16131	2
	Genitourinary symptoms and ill-defined conditions	30.6572	2
	Chronic ulcer of skin	7.31889	2
	Attention-deficit, conduct, and disruptive behavior disorders	1.15758	2
	Delirium, dementia, and amnestic and other cognitive disorders	14.7125	2
	Developmental disorders	1.38163	2
	Disorders usually diagnosed in infancy, childhood, or adolescence	1.19492	2
	Schizophrenia and other psychotic disorders	1.00822	2
	Neoplasms	8.17774	2
	Other endocrine disorders	1.12024	3
	Gout	1.7177	3
	Coagulation and hemorrhagic disorders	8.66318	3
	Retinal detachments; defects; vascular occlusion; and retinopathy	3.47274	3
	Glaucoma	12.696	3
	Heart valve disorders	2.65123	3
	Coronary atherosclerosis and other heart disease	4.14488	3
	Conduction disorders	2.53921	3
	Cardiac dysrhythmias	13.0695	3
	Congestive heart failure; nonhypertensive	9.78342	3
	Other circulatory disease	1.56833	3
	Chronic obstructive pulmonary disease and bronchiectasis	4.74235	3
	Asthma	9.48469	3
	Other liver diseases	2.38984	3
	Chronic renal failure	10.5302	3
	Other non-traumatic joint disorders	5.33981	3
	Obstructive sleep apnea	2.09111	3
	Obesity	17.6998	3
	Hypertension	70.7991	3
	Diabetes Mellitus	22.4421	3

## Sheet: Men0_2
	Diseases with Prevalence >= 1%	Prevalence (%)	Cluster
	Acute and chronic tonsilitis	1.19581	1
	Digestive congenital anomalies	1.71898	1
	Otitis media	36.6592	1
	Asthma	4.89537	2
	Other gastrointestinal disorders	1.12108	2
	Genitourinary congenital anomalies	2.50374	2
	Other upper respiratory diseases	3.06428	2
	Esophageal disorders	1.19581	3
	Inflammatory conditions of male genital organs	4.4843	3
	Other male genital disorders	3.25112	3
	Other congenital anomalies	4.11061	3
	Other upper respiratory infections	85.725	3

## Sheet: Men3_10
	Diseases with Prevalence >= 1%	Prevalence (%)	Cluster
	Other male genital disorders	4.67895	1
	Other inflammatory condition of skin	1.32887	1
	Digestive congenital anomalies	2.09939	1
	Other congenital anomalies	3.9531	1
	Miscellaneous mental health disorders	1.87605	1
	Headache; including migraine	4.53378	2
	Blindness and vision defects	7.8727	2
	Other gastrointestinal disorders	1.36237	2
	Delirium, dementia, and amnestic and other cognitive disorders	1.00503	2
	Disorders usually diagnosed in infancy, childhood, or adolescence	5.65047	2
	Obesity	1.22836	2
	Asthma	12.0045	3
	Allergic rhinitis	5.87381	3
	Other upper respiratory diseases	10.3183	3
	Other ear and sense organ disorders	2.01005	4
	Acute and chronic tonsilitis	6.36516	4
	Inflammatory conditions of male genital organs	3.77443	4
	Genitourinary congenital anomalies	2.49023	4
	Otitis media	25.818	4
	Wax in ear	2.09939	4
	Other upper respiratory infections	69.6594	4

## Sheet: Men11_17
	Diseases with Prevalence >= 1%	Prevalence (%)	Cluster
	Thyroid disorders	1.32592	1
	Blindness and vision defects	11.4414	1
	Other ear and sense organ disorders	1.98888	1
	Acute and chronic tonsilitis	6.6296	1
	Other inflammatory condition of skin	2.4166	1
	Other bone disease and musculoskeletal deformities	7.18563	1
	Genitourinary congenital anomalies	1.96749	1
	Delirium, dementia, and amnestic and other cognitive disorders	4.27716	1
	Other nutritional; endocrine; and metabolic disorders	1.60393	1
	Obesity	3.59281	1
	Headache; including migraine	9.66638	2
	Other gastrointestinal disorders	1.06929	2
	Other congenital anomalies	4.19162	2
	Anxiety disorders	2.35244	2
	Disorders usually diagnosed in infancy, childhood, or adolescence	7.18563	2
	Miscellaneous mental health disorders	2.50214	2
	Inflammatory conditions of male genital organs	2.07442	3
	Other male genital disorders	2.5663	3
	Otitis media	18.4987	3
	Other upper respiratory infections	65.8255	3
	Disorders of lipid metabolism	1.96749	4
	Asthma	17.4936	4
	Allergic rhinitis	16.0393	4
	Acne	7.69889	4
	Wax in ear	2.43798	4
	Other upper respiratory diseases	19.6963	4

## Sheet: Men18_65
	Diseases with Prevalence >= 1%	Prevalence (%)	Cluster
	Anxiety disorders	12.0252	1
	Mood disorder	6.39064	1
	Alcohol-related disorders	1.20612	1
	Substance related disorders	1.08011	1
	Screening and history of mental health and substance abuse codes	13.8434	1
	Disorders of lipid metabolism	8.78488	2
	Gout	1.44014	2
	Coagulation and hemorrhagic disorders	1.13411	2
	Glaucoma	1.20612	2
	Other nervous system disorders	1.85419	2
	Cardiac dysrhythmias	1.72817	2
	Esophageal disorders	2.59226	2
	Other liver diseases	1.11611	2
	Other gastrointestinal disorders	1.49415	2
	Hyperplasia of prostate	1.44014	2
	Other inflammatory condition of skin	4.30243	2
	Osteoarthritis	2.48425	2
	Spondylosis; intervertebral disc disorders; other back problems	3.36634	2
	Acquired foot deformities	1.0081	2
	Joint disorders and dislocations; trauma-related	1.36814	2
	Obstructive sleep apnea	2.44824	2
	Other nutritional; endocrine; and metabolic disorders	11.8992	2
	Obesity	6.39064	2
	Hypertension	12.1152	2
	Diabetes Mellitus	3.90639	2
	Conjunctivitis, keratitis	1.58416	2
	Thyroid disorders	3.58236	3
	Diseases of white blood cells	1.56616	3
	Headache; including migraine	8.33483	3
	Blindness and vision defects	6.10261	3
	Other ear and sense organ disorders	3.90639	3
	Asthma	10.423	3
	Inflammatory conditions of male genital organs	1.62016	3
	Other male genital disorders	2.70027	3
	Other non-traumatic joint disorders	1.0081	3
	Other bone disease and musculoskeletal deformities	4.32043	3
	Other congenital anomalies	1.67417	3
	Delirium, dementia, and amnestic and other cognitive disorders	1.60216	3
	Disorders usually diagnosed in infancy, childhood, or adolescence	1.17012	3
	Miscellaneous mental health disorders	6.21062	3
	Allergic rhinitis	16.1656	3
	Acne	7.43474	3
	Otitis media	7.77678	3
	Wax in ear	7.14671	3
	Other upper respiratory diseases	20.036	3
	Other upper respiratory infections	56.6517	3

## Sheet: Men>65
	Diseases with Prevalence >= 1%	Prevalence (%)	Cluster
	Thyroid disorders	0.0759036	1
	Other endocrine disorders	0.013253	1
	Coagulation and hemorrhagic disorders	0.123494	1
	Heart valve disorders	0.0204819	1
	Peri-; endo-; and myocarditis; cardiomyopathy (except that caused by tuberculosis or sexually transmitted disease)	0.0150602	1
	Cardiac dysrhythmias	0.154217	1
	Congestive heart failure; nonhypertensive	0.0981928	1
	Asthma	0.0451807	1
	Chronic renal failure	0.116265	1
	Parkinsons disease	0.0295181	2
	Other hereditary and degenerative nervous system conditions	0.0457831	2
	Epilepsy; convulsions	0.0150602	2
	Acute cerebrovascular disease	0.0789157	2
	Transient cerebral ischemia	0.053012	2
	Genitourinary symptoms and ill-defined conditions	0.166867	2
	Hyperplasia of prostate	0.275301	2
	Chronic ulcer of skin	0.0704819	2
	Osteoporosis	0.0337349	2
	Delirium, dementia, and amnestic and other cognitive disorders	0.0993976	2
	Mood disorder	0.137349	2
	Disorders of lipid metabolism	0.224699	3
	Headache; including migraine	0.0355422	3
	Blindness and vision defects	0.0710843	3
	Other circulatory disease	0.0253012	3
	Other liver diseases	0.0277108	3
	Other male genital disorders	0.0162651	3
	Rheumatoid arthritis and related disease	0.0120482	3
	Alcohol-related disorders	0.0210843	3
	Gout	0.096988	4
	Retinal detachments; defects; vascular occlusion; and retinopathy	0.0331325	4
	Acute myocardial infarction	0.0590361	4
	Coronary atherosclerosis and other heart disease	0.0825301	4
	Conduction disorders	0.0301205	4
	Peripheral and visceral atherosclerosis	0.046988	4
	Aortic; peripheral; and visceral artery aneurysms	0.0174699	4
	Chronic obstructive pulmonary disease and bronchiectasis	0.14759	4
	Other non-traumatic joint disorders	0.0313253	4
	Screening and history of mental health and substance abuse codes	0.0927711	4
	Neoplasms	0.153614	4
	Other nutritional; endocrine; and metabolic disorders	0.258434	4
	Obesity	0.11747	4
	Hypertension	0.65	4
	Diabetes Mellitus	0.250602	4
	Cataract	0.212651	5
	Glaucoma	0.111446	5
	Other eye disorders	0.0228916	5
	Other ear and sense organ disorders	0.129518	5
	Other nervous system disorders	0.0427711	5
	Esophageal disorders	0.039759	5
	Diverticulosis and diverticulitis	0.0463855	5
	Other gastrointestinal disorders	0.0240964	5
	Inflammatory conditions of male genital organs	0.0114458	5
	Other inflammatory condition of skin	0.0542169	5
	Osteoarthritis	0.266867	5
	Spondylosis; intervertebral disc disorders; other back problems	0.136747	5
	Acquired foot deformities	0.0271084	5
	Obstructive sleep apnea	0.0409639	5
	Anxiety disorders	0.109639	5
	Miscellaneous mental health disorders	0.0566265	5
	Allergic rhinitis	0.0662651	5
	Otitis media	0.0313253	5
	External otitis	0.0108434	5
	Wax in ear	0.109639	5
	Other upper respiratory diseases	0.107229	5
	Other upper respiratory infections	0.496988	5
